# Supplementary material for: Melatonin alleviates meiotic defects in fetal mouse oocytes induced by Di (2-ethylhexyl) phthalate in vitro
Source: publisher site journal article supplement (doi:10.18632/aging.101715), 2018-12-26
Supplement: Supplementary file [file aging-v10i12-101715-supplementary-material-SD1.pdf]

## SUPPLEMENTARY TABLES

**Table S1. Primary antibodies.**

| Antibody       | Vendor; Cat. No.             | Dilution | Applications       |
|----------------|------------------------------|----------|--------------------|
| Sycp3(Rb)      | Novus Biologicals; NB300-232 | 1:1000   | Western Blot       |
|                |                              | 1:200    | Immunofluorescence |
| Sycp3(Mus)     | Abcam; ab97672               | 1:200    | Immunofluorescence |
| $\gamma$ H2afx | Abcam, ab26350               | 1:1000   | Western Blot       |
|                |                              | 1:200    | Immunofluorescence |
| RAD51          | Abcam; ab133534              | 1:200    | Immunofluorescence |
| MLH1           | BD Pharmingen, 551091        | 1:200    | Immunofluorescence |
| MVH            | Abcam, ab13840               | 1:200    | Immunofluorescence |
| BAX            | Cell signaling, #2772s       | 1:1000   | Western Blot       |
| BCL-2          | Beyotime, AB112              | 1:1000   | Western Blot       |
| $\beta$ -Actb  | Sangon Biotech; D110001      | 1:1000   | Western Blot       |

**Table S2. Primers used for quantitative RT-PCR.**

| Genes        | Genbank      | Forward primer sequence | Reverse primer sequence | Product Length (bp) |
|--------------|--------------|-------------------------|-------------------------|---------------------|
| <i>Actin</i> | NM_007393.3  | TCGTGGGCCGCTCTAGGCAC    | TGGCCTTAGGGTTCAGGGGGG   | 255                 |
| <i>Trp53</i> | NM_001127233 | ACAGTCGGATATCAGCCTCG    | GCTTCACTTGGGCCTTCAAA    | 159                 |
| <i>Sycp3</i> | NM_011517.2  | GGGGCCGGACTGTATTTACT    | AGGCTGATCAACCAAAGGTG    | 169                 |
| <i>Bax</i>   | NM_007527    | ATGCGTCCAAGGAAGACTGAG   | CCCAGTTGAAGTTGCCATCAG   | 162                 |
| <i>Bcl-2</i> | NM_009741.5  | GCAGAGATGTCCAGTCAG      | CACCGAACTCAAAGAAGG      | 127                 |
